# Supplementary material
Source: PubMed Central journal article supplement (PMC4362534)
Supplement: NIHMS628924-supplement-1.pdf [file NIHMS628924-supplement-1.pdf]

## **Inventory of Supplemental Information**

### **Supplemental Data**

**1. Figure S1, Related to Figure 1**

Antibody detection of co-receptors in mouse tissue, single panel immunofluorescence channels, additional co-immunofluorescence analysis, and RT-qPCR data for HH pathway components in both mouse and human samples.

**2. Figure S2, Related to Figure 2**

Additional co-injection experiment growth curves and SHH expression from human pancreatic tumor cells

**3. Figure S3, Related to Figure 3**

Histological and RT-qPCR analysis of subcutaneous co-injection tumors,

**4. Figure S4**

RT-qPCR analysis of angiogenic factors from fibroblasts, additional CAM assays with mouse tumors cells as well as fibroblasts alone.

### **Supplemental Experimental Procedures**

Additional experimental procedures not included in main text.

### **Supplemental References**

Additional references not in main text that are cited in supplemental experimental procedures.
